# Supplementary material for: Real-time seizure detection in paediatric intensive care patients: the RESET child brain protocol
Source: HighWire-hosted journal article supplement (doi:10.1136/bmjopen-2021-059301), 2022-06-01
Supplement: bmjopen-2021-059301supp001_data_supplement.pdf [file bmjopen-2021-059301supp001_data_supplement.pdf]

**Supplementary/Appendix:****Appendix 1: Patient at risk of seizures categories (EEG monitoring pathway)**

Strong recommendations:

- I) patients with persistently altered mental status after seizures,
- II) patients with acute supratentorial brain injury with altered mental state,
- III) PICU patients without primary brain injury and fluctuating or unexplained alteration in mental status.

Weak recommendations

- IV) patients at risk of seizures that are under pharmacological paralysis and
- V) paroxysmal events suspected by PICU personnel to be seizures.

**Specifically, at CHQ:**

PICU patients that are comatose or intubated and ventilated and cannot be safely lightened for clinical assessment or infants aged less than 2 years where one of the following risk factors is present:

1. suspicion of non-convulsive seizures among encephalopathic patients (with or without concomitant muscle relaxation):
2. Recent clinical seizure or SE with delayed return to baseline conscious state (>60 min after seizure medication); earlier if clinical evidence of continued seizures or clinical concerns
3. Encephalopathy with suspicion of electrographic seizures – especially autoimmune encephalitis
4. Recent stroke (ischemic, haemorrhagic, sinovenous thrombosis = CSVT) with clinical seizures
5. Recent stroke (ischemic, haemorrhagic, sinovenous thrombosis) in children < 5 years of age with or without clinical seizures
6. Known Epilepsy diagnosis and high risk of subclinical seizures
7. Structural brain abnormality with high risk of subclinical seizures
8. ECMO with suspicion of seizures or brain injury
9. Recent cardiac procedure with suspicion of seizures in infants < 2 years of age
10. Suspected electrographic seizures in patients with unexplained altered mental status
11. Intracranial haemorrhage including TBI, SAH, ICH
12. Acute brain injury and prolonged use of muscle relaxants (e.g. drowning, neonatal HIE, recent cardiac arrest)
13. neonatal HIE patients in PICU for other reasons within 5 days of their acute insult
14. Acute supratentorial brain injury with altered mental state (moderate/severe TBI (accidental or NAI), CNS infections, recent neurosurgical procedures, brain tumours, HIE, sepsis associated encephalopathy)

**Appendix 2: Data collection parameters and source**

Table 3. Variables and definitions

| Variable                                     | Definition                                                                                                                                                       | Data collection |
|----------------------------------------------|------------------------------------------------------------------------------------------------------------------------------------------------------------------|-----------------|
| QEEG                                         |                                                                                                                                                                  |                 |
| Seizure (no clinical) certain                | ≥ 3 QEEG trends indicative of seizure, no observed clinical manifestations                                                                                       | QEEG comment    |
| Seizure (clinical) certain                   | ≥ 3 QEEG trends indicative of seizure, observed clinical manifestations                                                                                          | QEEG comment    |
| Status epilepticus (no clinical) certain     | ≥ 3 QEEG trends indicative of seizure, lasting > 10 min OR multiple seizures occur per hour making up more than 10 min, no observed clinical manifestations      | QEEG comment    |
| Status epilepticus (clinical) certain        | ≥ 3 QEEG trends indicative of seizure, lasting > 10 min OR multiple seizures occur per hour making up more than 10 min, observed clinical manifestations         | QEEG comment    |
| QEEG screened hourly                         | Bedside clinician has assessed QEEG 1-hour epoch                                                                                                                 | QEEG comment    |
| Time to seizure recognition QEEG             | Date/time stamp of seizure certain comment on QEEG                                                                                                               | QEEG comment    |
| Seizure event verified by neurologist        | Date/time stamp of seizure confirmed comment on QEEG                                                                                                             | QEEG comment    |
| Event confirmed “not seizure” by neurologist | Date/time stamp of Event confirmed “not seizure” comment on QEEG                                                                                                 | QEEG comment    |
| EEG                                          |                                                                                                                                                                  |                 |
| EEG duration                                 | EEG start and stop date/time                                                                                                                                     | EEG annotation  |
| Seizures present (yes/no)                    | Clinical or subclinical seizures present on cEEG expert review                                                                                                   | EEG annotation  |
| Seizures clinical (yes/no)                   | Clinical manifestations present on video or annotations                                                                                                          | EEG annotation  |
| Seizure duration                             | Seizure onset and offset                                                                                                                                         | EEG annotation  |
| Seizure duration category                    | < 1 min<br>1-5 min<br>> 5 min                                                                                                                                    | EEG annotation  |
| Spatial extension of seizure                 | focal (≤ 4 unilateral electrodes involved)<br>hemispheric (unilateral but > 4 electrodes involved)<br>generalized/bilateral (bilateral, > 4 electrodes involved) | EEG annotation  |
| Electrographic status epilepticus            | a single seizure lasting > 10min or recurrent seizures totalling > 10 min in any 1-h period (hourly seizure burden > 10%)                                        | EEG annotation  |
| Status epilepticus clinical (yes/no)         | Clinical manifestations present on video or annotations                                                                                                          | EEG annotation  |
| EEG background category                      | normal or sedated sleep<br>slow and disorganized<br>discontinuous or burst suppression<br>attenuated and featureless                                             | EEG annotation  |

|                                                        |                                                                                                                                                                                                                                                                                                                                                                                                                                                                                                                                                                                            |                           |
|--------------------------------------------------------|--------------------------------------------------------------------------------------------------------------------------------------------------------------------------------------------------------------------------------------------------------------------------------------------------------------------------------------------------------------------------------------------------------------------------------------------------------------------------------------------------------------------------------------------------------------------------------------------|---------------------------|
| Time to seizure recognition cEEG                       | Date/time stamp of seizure annotation on cEEG                                                                                                                                                                                                                                                                                                                                                                                                                                                                                                                                              | EEG annotation            |
| Spike amplitude                                        | average amplitude during electrographic seizures as $\leq 50 \mu\text{V}$ or $> 50\mu\text{V}$ .                                                                                                                                                                                                                                                                                                                                                                                                                                                                                           | EEG annotation            |
| Patient characteristics                                |                                                                                                                                                                                                                                                                                                                                                                                                                                                                                                                                                                                            |                           |
| Gender                                                 | Male, female                                                                                                                                                                                                                                                                                                                                                                                                                                                                                                                                                                               | EEG request form          |
| Age                                                    | Years, months, days                                                                                                                                                                                                                                                                                                                                                                                                                                                                                                                                                                        | EEG request form          |
| Primary diagnosis or indication for cEEG               | Refractory status epilepticus<br>Encephalopathy with suspicion of electrographic seizures<br>Recent stroke (ischemic, haemorrhagic, sinovenous thrombosis)<br>Epilepsy (history of seizures)<br>Structural brain malformation<br>ECMO and suspicion of brain injury<br>Cardiac procedure and suspicion of brain injury<br>Traumatic brain injury (TBI)<br>Non-accidental injury (NAI)<br>CNS infection (meningitis/encephalitis)<br>Recent neurosurgical procedure (postoperative craniotomy)<br>Brain tumour<br>Hypoxic-ischemic encephalopathy (HIE)<br>Sepsis associated encephalopathy | EEG request form          |
| Primary discharge category/factor for risk of seizures | systemic disease,<br>acute seizures,<br>acute brain injury                                                                                                                                                                                                                                                                                                                                                                                                                                                                                                                                 | Electronic medical record |
| Time to seizure recognition chart                      | Date/time stamp of chart entry referencing seizure recognition and/or management                                                                                                                                                                                                                                                                                                                                                                                                                                                                                                           | Electronic medical record |
| Hospital length of stay (LOS)                          | Date/time of hospital admission and discharge                                                                                                                                                                                                                                                                                                                                                                                                                                                                                                                                              | Electronic medical record |
| PICU LOS                                               | Date/time of PICU admission and discharge                                                                                                                                                                                                                                                                                                                                                                                                                                                                                                                                                  | Electronic medical record |
| Adverse events                                         | Pressure areas related to EEG electrode placement                                                                                                                                                                                                                                                                                                                                                                                                                                                                                                                                          | Electronic medical record |

EEG: electroencephalogram; cEEG: continuously monitored electroencephalogram; QEEG: quantitative electroencephalogram; ECMO: extracorporeal membrane oxygenation; CNS: central nervous system; PICU: paediatric intensive care unit; LOS: length of stay
